# Supplementary material for: Head Lice Infestation in Schoolchildren, in Poland—Is There a Chance for Change?
Source: MDPI journal article supplement (doi:10.3390/jcm11030783), 2022-01-31
Supplement: s1 [file s1]

## Supplementary files

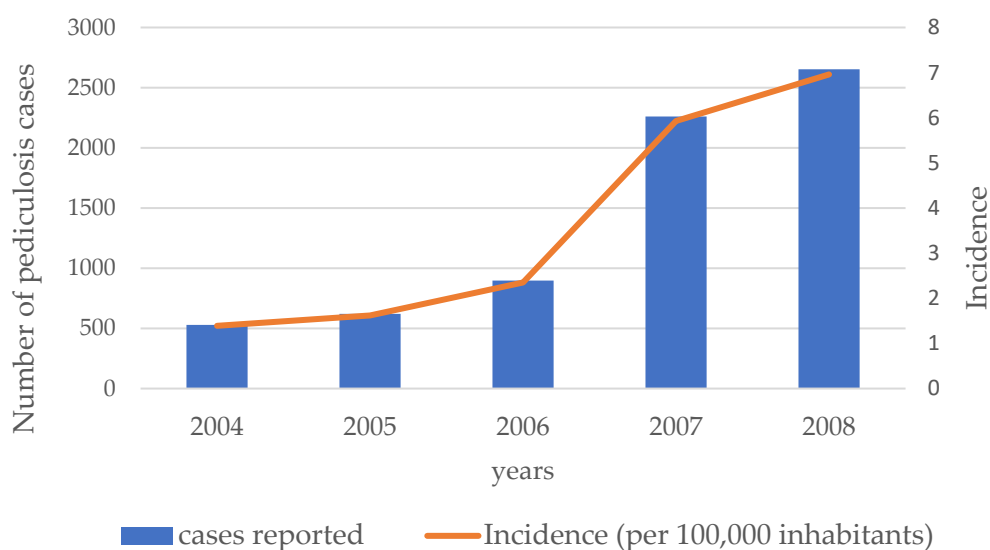

**Figure S1.** Pediculosis\* in Poland, in the last five years when the regulations required to report its cases to the State Sanitary Inspection (source: Infectious diseases and poisonings in Poland 2004-2008, National Institute of Public Health, National Institute of Hygiene, Department of Epidemiology, Chief Sanitary Inspectorate, Department of Communicable Diseases Control). \* The reports do not differentiate between pediculosis capitis, pediculosis corporis, and phthiriasis.
